# Supplementary material
Source: PubMed Central journal article supplement (PMC6690692)
Supplement: supp_RA119.009509_153079_1_supp_350448_ptd53t.pdf [file supp_RA119.009509_153079_1_supp_350448_ptd53t.pdf]

## Supporting Information

### Substrate selectivity in starch polysaccharide monooxygenases

Van V. Vu<sup>1\*</sup>, John A. Hangasky<sup>2</sup>, Tyler C. Detomasi<sup>3</sup>, Skylar Henry<sup>4</sup>, Son Tung Ngo<sup>5,6</sup>,  
Elise A. Span<sup>7</sup>, and Michael A. Marletta<sup>2,3,4\*</sup>

<sup>1</sup>NTT Hi-Tech Institute, Nguyen Tat Thanh University, Ho Chi Minh City, Vietnam

<sup>2</sup>California Institute for Quantitative Biosciences (QB3), University of California Berkeley,  
Berkeley, California, USA 94720

<sup>3</sup>Department of Chemistry, University of California Berkeley, Berkeley, California, USA  
94720

<sup>4</sup>Department of Molecular and Cell Biology, University of California Berkeley, Berkeley,  
California, USA 94720

<sup>5</sup>Laboratory of Theoretical and Computational Biophysics, Ton Duc Thang University,  
Vietnam

<sup>6</sup>Faculty of Applied Sciences, Ton Duc Thang University, Ho Chi Minh City, Vietnam

<sup>7</sup>Biophysics Graduate Group, University of California, Berkeley, California, USA 94720

\*To whom correspondence should be addressed: Van V. Vu (Email: [vanvu@ntt.edu.vn](mailto:vanvu@ntt.edu.vn)),  
Michael A. Marletta (Tel: 510-642-8758 Email: [marletta@berkeley.edu](mailto:marletta@berkeley.edu))

## Table of Contents:

|                                                                    |   |
|--------------------------------------------------------------------|---|
| Amino acid sequences of AA13 PMOs used in this study               | 3 |
| <b>Figure S1.</b> Relative activities of AA13 PMOs                 | 4 |
| <b>Figure S2.</b> HPAEC-PAD chromatograms for <i>NcAA13</i> ΔCBM   | 4 |
| <b>Figure S3.</b> HPAEC-PAD chromatograms for <i>NcAA13</i> cat    | 5 |
| <b>Figure S4.</b> HPAEC-PAD chromatogram for <i>MtAA13</i> +CBM    | 5 |
| <b>Figure S5.</b> Rates of O <sub>2</sub> reduction by AA13 PMOs   | 6 |
| <b>Figure S6.</b> Docking of random coil amylose to <i>AoAA13</i>  | 7 |
| <b>Figure S7.</b> Docking of single amylose helix to <i>AoAA13</i> | 7 |
| <b>Table S1.</b> Putative AA13 PMOs identified from the SSN        | 8 |

## Amino acid sequences of AA13 PMOs used in this study

### >NcAA13

HGYLTIPFSRTRLGAEAGLDTCPCECSILEPVTAWPNVTEAKVGRSGPCGYNARV SIDYNQPATN  
WGNSPVVITYTAGDTVDVQWCVDHNGDHGGMFSYRICQDQELVNKFLTPGYLPTEAEKQAAE  
DCFEKGTLPCTDVNGQSCDFSPDCQQGQACWRNDWFTCNAFQADSRRGCQGV DNAALGSC  
FTTIAGGYTVTKKIKIPNYISGHTLLSFRWNSFQTAQVYLSCADIAIVGDSASTTKVSATATTLVTS  
SKTASASCTPAATVAVTFNHLASTSYGESIKIVGSISQLGSWSASSGVALSASQYTTSNPLWTA  
TVSLPAGTKFEYKFVKVSSEGSVAVTW ESDPNRSYTVPQSCAESVAVESSWK

### >NcAA13ΔCBM

HGYLTIPFSRTRLGAEAGLDTCPCECSILEPVTAWPNVTEAKVGRSGPCGYNARV SIDYNQPATN  
WGNSPVVITYTAGDTVDVQWCVDHNGDHGGMFSYRICQDQELVNKFLTPGYLPTEAEKQAAE  
DCFEKGTLPCTDVNGQSCDFSPDCQQGQACWRNDWFTCNAFQADSRRGCQGV DNAALGSC  
FTTIAGGYTVTKKIKIPNYISGHTLLSFRWNSFQTAQVYLSCADIAIVGD  
SASTTKVSATATTLVTSSKTASAS

### >NcAA13cat

HGYLTIPFSRTRLGAEAGLDTCPCECSILEPVTAWPNVTEAKVGRSGPCGYNARV SIDYNQPATN  
WGNSPVVITYTAGDTVDVQWCVDHNGDHGGMFSYRICQDQELVNKFLTPGYLPTEAEKQAAE  
DCFEKGTLPCTDVNGQSCDFSPDCQQGQACWRNDWFTCNAFQADSRRGCQGV DNAALGSC  
FTTIAGGYTVTKKIKIPNYISGHTLLSFRWNSFQTAQVYLSCADIAIVGD

### >MtAA13

HGYLTIPSSRTRLGAEAGLDSCPECSILEPVQSWPDLDAALVGRSGPCGYNARV SIDYNQPGE  
HWGNP VATYSPGQVVEVQWCVDHNGDHGGMFSYRICQNQTLVDKFLTPGYLP TADEKQAA  
EDCFQAGT L SCKDVTGQDCGYNPDCSEGQPCWRNDWFTCNAFQADSKRACQGV DNA PQG  
SCYTSISGGFPVTKKIKIPDYQSSHTLLSFKWNSFQTGQIYLSCADIAITASN

### >MtAA13+CBM

HGYLTIPSSRTRLGAEAGLDSCPECSILEPVQSWPDLDAALVGRSGPCGYNARV SIDYNQPGE  
HWGNP VATYSPGQVVEVQWCVDHNGDHGGMFSYRICQNQTLVDKFLTPGYLP TADEKQAA  
EDCFQAGT L SCKDVTGQDCGYNPDCSEGQPCWRNDWFTCNAFQADSKRACQGV DNA PQG  
SCYTSISGGFPVTKKIKIPDYQSSHTLLSFKWNSFQTGQIYLSCADIAITASN

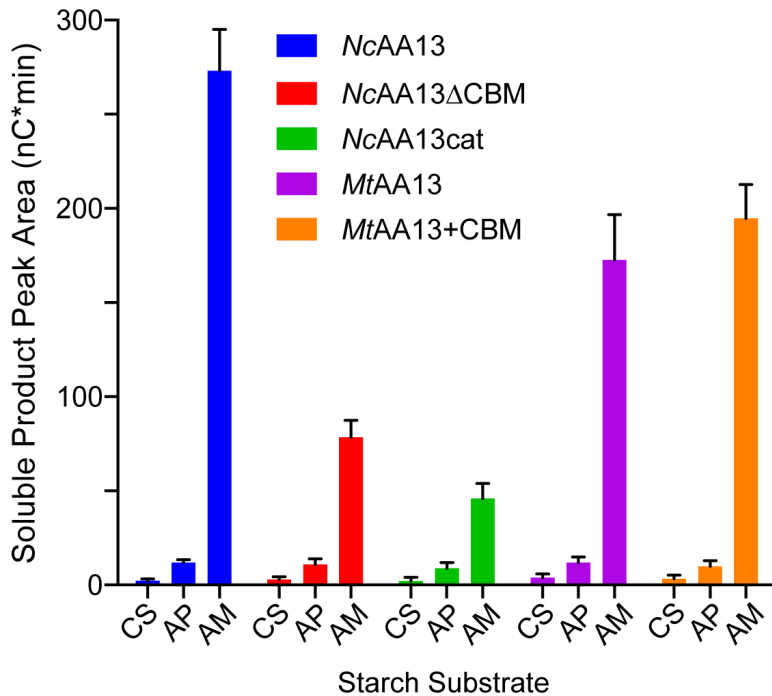

**Figure S1.** Relative activity of AA13 PMOs on cornstarch, amylopectin and potato amylose. PMO (5  $\mu$ M), ascorbic acid (2 mM) and 50 mg/mL starch polysaccharide in 50 mM sodium acetate buffer pH 5.0 were shaken at 1100 RPM for 2 hours at 40°C. CS = cornstarch; AP = amylopectin; AM = amylose

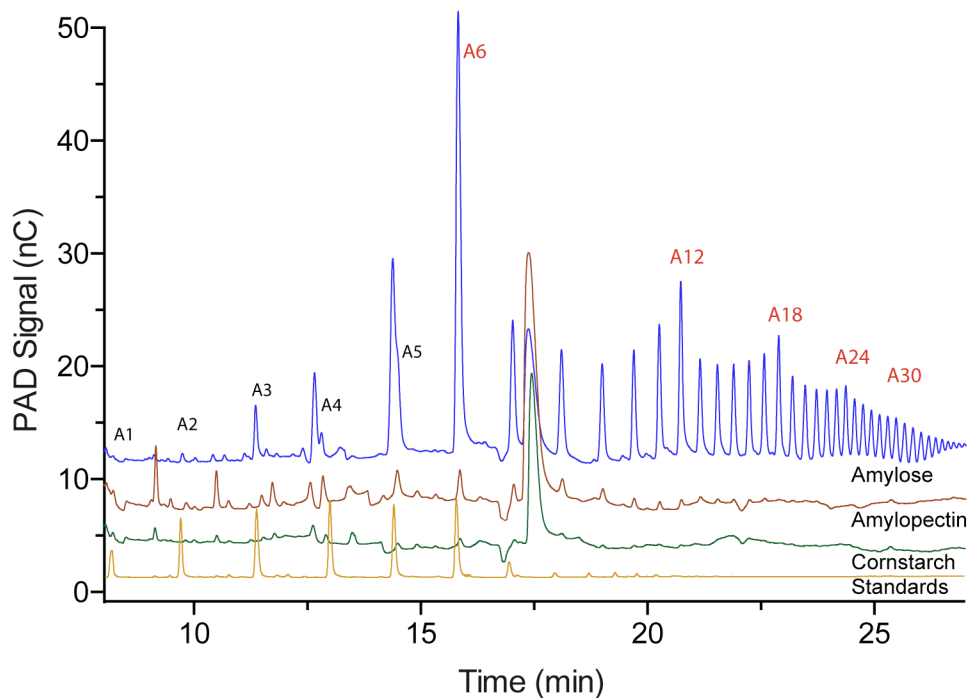

**Figure S2.** HPAEC-PAD chromatograms for *NcAA13*ΔCBM.

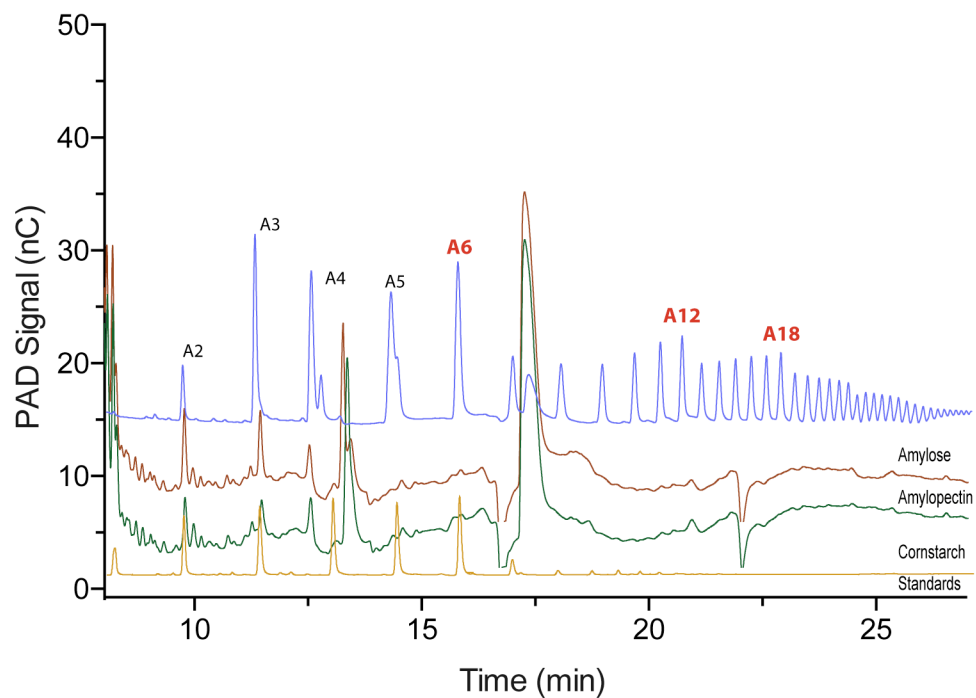

**Figure S3.** HPAEC-PAD chromatograms for *NcAA13cat*.

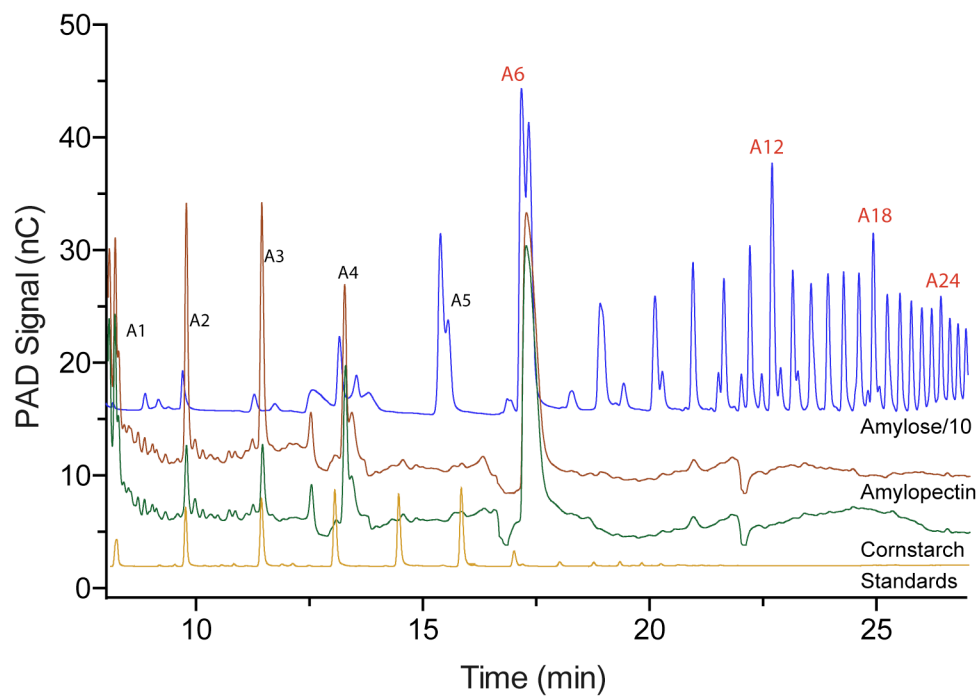

**Figure S4.** HPAEC-PAD chromatograms for *MtAA13+CBM*.

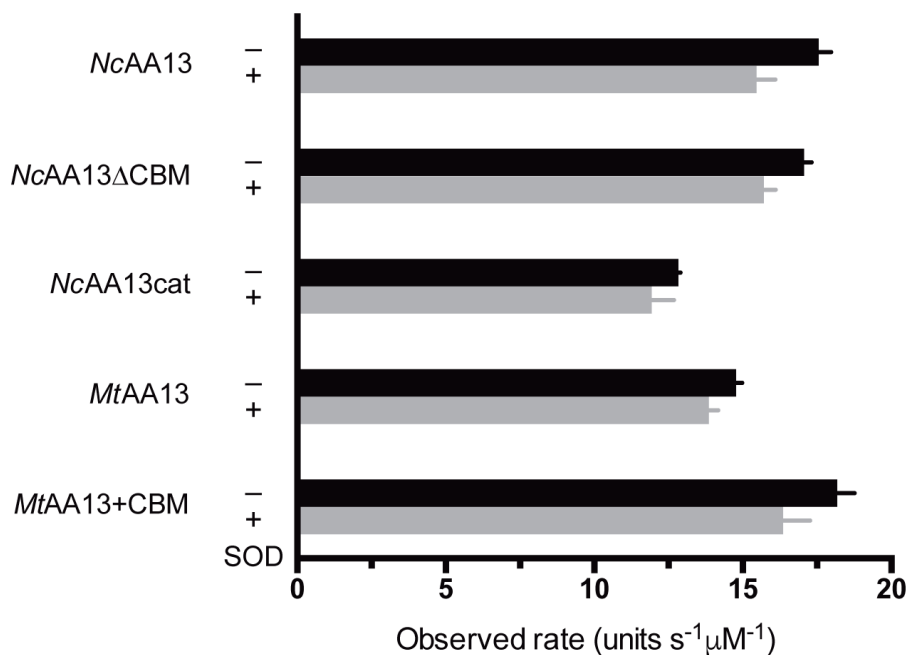

**Figure S5. Rates of O<sub>2</sub> reduction by AA13 PMOs.** Determined using a horseradish peroxidase (HRP) coupled assay in the presence (+) and absence (-) of superoxide dismutase (SOD, 250 units/mL). Reactions contained PMO (1 μM), HRP (1.3 μM), and Amplex Red (100 μM) in 50 mM MOPS pH 7.0 and were initiated by the addition of ascorbic acid (2 mM). Error bars represent one standard deviation of the mean (n=3).

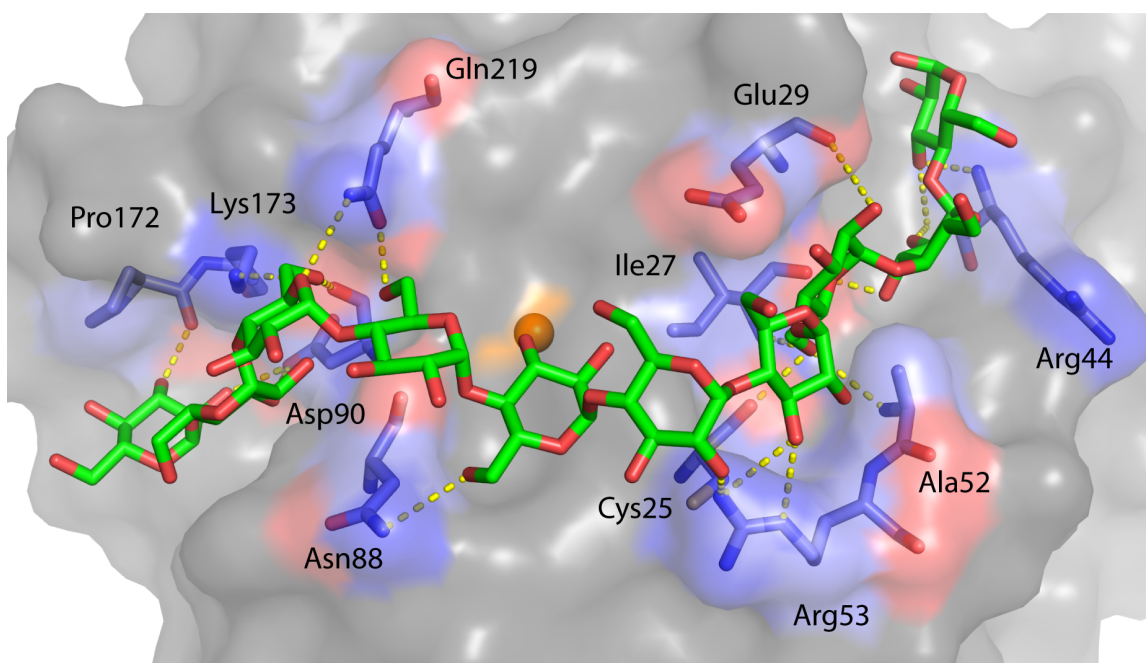

**Figure S6.** The three-dimensional docking model for the random amylose coil and AαAA13. The yellow dashed lines correspond to H-bonds between the substrate and enzyme.

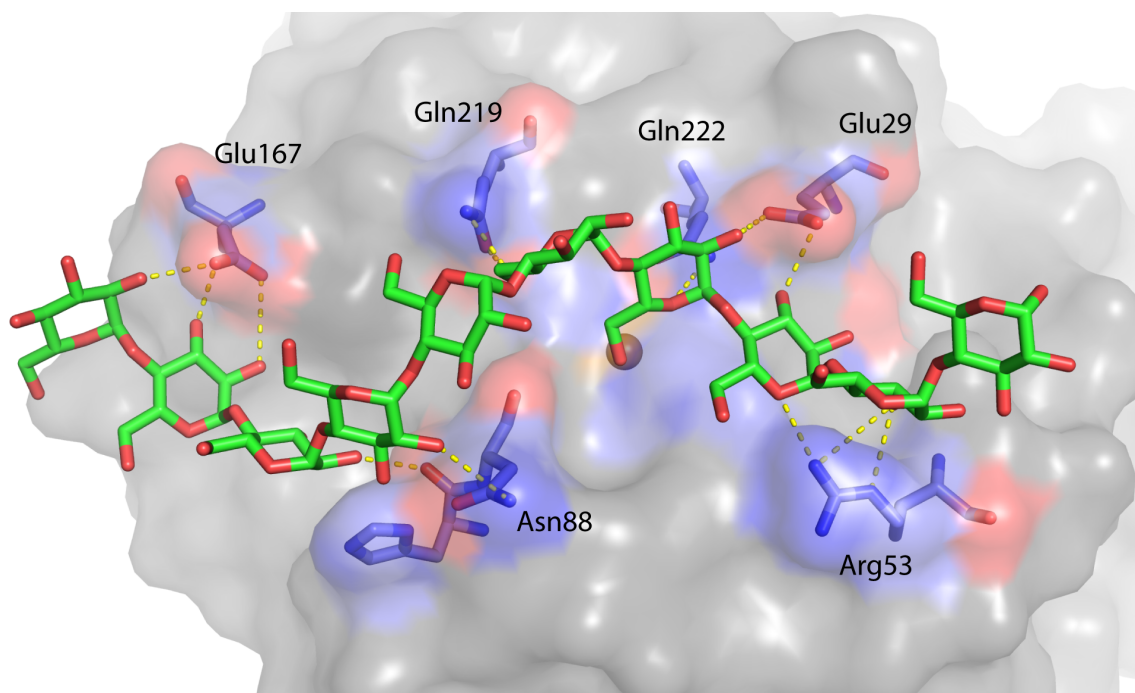

**Figure S7.** The three-dimensional docking model of an amylose single helix and AoAA13. The yellow dashed lines correspond to H-bonds between the substrate and enzyme.

**Table S1.** List of Putative AA13 PMOs identified from the SSN

| Uniprot ID        | Gene names             | Organism                                                                                                                                   |
|-------------------|------------------------|--------------------------------------------------------------------------------------------------------------------------------------------|
| <b>A0A086T7N6</b> | ACRE_038340            | <i>Acremonium chrysogenum</i> (strain ATCC 11550 / CBS 779.69 / DSM 880 / JCM 23072 / IMI 49137)                                           |
| <b>A0A177DCW3</b> | CC77DRAFT_279631       | <i>Alternaria alternata</i> (Alternaria rot fungus) ( <i>Torula alternata</i> )                                                            |
| <b>G1XQZ0</b>     | AOL_s00188g352         | <i>Arthrobotrys oligospora</i> (strain ATCC 24927 / CBS 115.81 / DSM 1491) (Nematode-trapping fungus) ( <i>Didymozoophaga oligospora</i> ) |
| <b>A0A1L9WHG2</b> | ASPACDRAFT_187572<br>9 | <i>Aspergillus aculeatus</i> ATCC 16872                                                                                                    |
| <b>A0A1F8AEL3</b> | ABOM_001080            | <i>Aspergillus bombycis</i>                                                                                                                |
| <b>A0A0U5GC36</b> | ASPCAL12954            | <i>Aspergillus calidoustus</i>                                                                                                             |
| <b>A0A0U5GSG2</b> | ASPCAL03191            | <i>Aspergillus calidoustus</i>                                                                                                             |
| <b>A0A211DBF8</b> | P168DRAFT_315717       | <i>Aspergillus campestris</i> IBT 28561                                                                                                    |
| <b>A0A212FE25</b> | BDW47DRAFT_104467      | <i>Aspergillus candidus</i>                                                                                                                |
| <b>A1CDY2</b>     | ACLA_008190            | <i>Aspergillus clavatus</i> (strain ATCC 1007 / CBS 513.65 / DSM 816 / NCTC 3887 / NRRL 1)                                                 |
| <b>A1CN59</b>     | ACLA_099410            | <i>Aspergillus clavatus</i> (strain ATCC 1007 / CBS 513.65 / DSM 816 / NCTC 3887 / NRRL 1)                                                 |
| <b>A0A0J5PLS4</b> | Y699_08665             | <i>Aspergillus fumigatus</i> Z5                                                                                                            |

|                   |                     |                                                                                                                                     |
|-------------------|---------------------|-------------------------------------------------------------------------------------------------------------------------------------|
| <b>A0A0S7DPS2</b> | ALT_3234            | <i>Aspergillus lentulus</i>                                                                                                         |
| <b>A0A0S7E6Q6</b> | ALT_7690            | <i>Aspergillus lentulus</i>                                                                                                         |
| <b>A0A0L1IRR4</b> | ANOM_010742         | <i>Aspergillus nomius</i> NRRL 13137                                                                                                |
| <b>A0A2I1BYW6</b> | P174DRAFT_514621    | <i>Aspergillus novofumigatus</i> IBT 16806                                                                                          |
| <b>A0A2I1C802</b> | P174DRAFT_388563    | <i>Aspergillus novofumigatus</i> IBT 16806                                                                                          |
| <b>I8A699</b>     | Ao3042_02852        | <i>Aspergillus oryzae</i> (strain 3.042) (Yellow koji mold)                                                                         |
| <b>Q2U8Y3</b>     | AO090701000246      | <i>Aspergillus oryzae</i> (strain ATCC 42149 / RIB 40) (Yellow koji mold)                                                           |
| <b>A0A1S9DA65</b> | OAory_01016380      | <i>Aspergillus oryzae</i> (Yellow koji mold)                                                                                        |
| <b>A0A2I2FWK1</b> | P170DRAFT_366747    | <i>Aspergillus steynii</i> IBT 23096                                                                                                |
| <b>A0A1L9U0T5</b> | ASPSYDRAFT_54588    | <i>Aspergillus sydowii</i> CBS 593.65                                                                                               |
| <b>A0A2J5I000</b> | BDW42DRAFT_165265   | <i>Aspergillus taichungensis</i>                                                                                                    |
| <b>Q0CFN7</b>     | ATEG_07497          | <i>Aspergillus terreus</i> (strain NIH 2624 / FGSC A1156)                                                                           |
| <b>Q0CGA6</b>     | ATEG_07286          | <i>Aspergillus terreus</i> (strain NIH 2624 / FGSC A1156)                                                                           |
| <b>A0A231MI14</b> | CDV56_03360         | <i>Aspergillus thermomutatus</i>                                                                                                    |
| <b>A0A0K8LDU5</b> | AUD_5347            | <i>Aspergillus udagawae</i>                                                                                                         |
| <b>A0A1L9PD13</b> | ASPVEDRAFT_26243    | <i>Aspergillus versicolor</i> CBS 583.65                                                                                            |
| <b>A0A0B7K062</b> | BN869_000006652_1   | <i>Bionectria ochroleuca</i> ( <i>Gliocladium roseum</i> )                                                                          |
| <b>W6Z8F0</b>     | COCMIDRAFT_4809     | <i>Bipolaris oryzae</i> ATCC 44560                                                                                                  |
| <b>W7E8Q4</b>     | COCVIDRAFT_16131    | <i>Bipolaris victoriae</i> FI3                                                                                                      |
| <b>W6YYE8</b>     | COCCADRAFT_2463     | <i>Bipolaris zeicola</i> 26-R-13                                                                                                    |
| <b>M7UUT4</b>     | BcDW1_3780          | <i>Botryotinia fuckeliana</i> (strain BcDW1) (Noble rot fungus) ( <i>Botrytis cinerea</i> )                                         |
| <b>G2YZ29</b>     | BofuT4P101000017001 | <i>Botryotinia fuckeliana</i> (strain T4) (Noble rot fungus) ( <i>Botrytis cinerea</i> )                                            |
| <b>Q2GZT1</b>     | CHGG_04965          | <i>Chaetomium globosum</i> (strain ATCC 6205 / CBS 148.51 / DSM 1962 / NBRC 6347 / NRRL 1970) (Soil fungus)                         |
| <b>M2S5V9</b>     | COCSADRAFT_191741   | <i>Cochliobolus sativus</i> (strain ND90Pr / ATCC 201652) (Common root rot and spot blotch fungus) ( <i>Bipolaris sorokiniana</i> ) |
| <b>A0A1Q8RYS4</b> | CCHL11_01311        | <i>Colletotrichum chlorophyti</i>                                                                                                   |
| <b>A0A010RMK9</b> | CFIO01_05002        | <i>Colletotrichum fioriniae</i> PJ7                                                                                                 |
| <b>T0MA78</b>     | CGLO_01909          | <i>Colletotrichum gloeosporioides</i> (strain Cg-14) (Anthracnose fungus) ( <i>Glomerella cingulata</i> )                           |
| <b>L2G5Y0</b>     | CGGC5_6145          | <i>Colletotrichum gloeosporioides</i> (strain Nara gc5) (Anthracnose fungus) ( <i>Glomerella cingulata</i> )                        |
| <b>E3QKY3</b>     | GLRG_06810          | <i>Colletotrichum graminicola</i> (strain M1.001 / M2 / FGSC 10212) (Maize anthracnose fungus) ( <i>Glomerella graminicola</i> )    |
| <b>H1V4C0</b>     | CH063_06930         | <i>Colletotrichum higginsianum</i> (strain IMI 349063) (Crucifer anthracnose fungus)                                                |
| <b>A0A1B7Y366</b> | CH63R_10554         | <i>Colletotrichum higginsianum</i> (strain IMI 349063) (Crucifer anthracnose fungus)                                                |



|                   |                              |                                                                                                                                                                       |
|-------------------|------------------------------|-----------------------------------------------------------------------------------------------------------------------------------------------------------------------|
| <b>A0A167CH28</b> | CI238_02795<br>CSPAĒ12_11820 | <i>Colletotrichum incanum</i>                                                                                                                                         |
| <b>A0A135UQD8</b> | CNYM01_02813                 | <i>Colletotrichum nympheae</i> SA-01                                                                                                                                  |
| <b>N4VB78</b>     | Cob_11323                    | <i>Colletotrichum orbiculare</i> (strain 104-T / ATCC 96160 / CBS 514.97 / LARS 414 / MAFF 240422) (Cucumber anthracnose fungus) ( <i>Colletotrichum lagenarium</i> ) |
| <b>A0A135V3Z7</b> | CSAL01_04573                 | <i>Colletotrichum salicis</i>                                                                                                                                         |
| <b>A0A135SKR2</b> | CSIM01_04997                 | <i>Colletotrichum simmondsii</i>                                                                                                                                      |
| <b>A0A066XEI0</b> | CSUB01_07202                 | <i>Colletotrichum sublineola</i> (Sorghum anthracnose fungus)                                                                                                         |
| <b>A0A161W435</b> | CT0861_04005                 | <i>Colletotrichum tofieldiae</i>                                                                                                                                      |
| <b>A0A1J7JBA6</b> | CONLIGDRAFT_71720<br>7       | <i>Coniochaeta ligniaria</i> NRRL 30616                                                                                                                               |
| <b>A0A1Y2WPL0</b> | K445DRAFT_69239              | <i>Daldinia</i> sp. EC12                                                                                                                                              |
| <b>A0A0G2HSM7</b> | UCDDA912_g08868              | <i>Diaporthe ampelina</i>                                                                                                                                             |
| <b>A0A163MI62</b> | ST47_g119                    | <i>Didymella rabiei</i> (Chickpea ascochyta blight fungus) ( <i>Mycosphaerella rabiei</i> )                                                                           |
| <b>A0A1Y2M8E7</b> | B5807_02758                  | <i>Epicoccum nigrum</i> (Soil fungus) ( <i>Epicoccum purpurascens</i> )                                                                                               |
| <b>M7T9X2</b>     | UCREL1_6413                  | <i>Eutypa lata</i> (strain UCR-EL1) (Grapevine dieback disease fungus) ( <i>Eutypa armeniaca</i> )                                                                    |
| <b>A0A1V1T6T1</b> | ANO14919_060010              | fungal sp. No.14919                                                                                                                                                   |
| <b>A0A1L7TN90</b> | FMAN_11051                   | <i>Fusarium mangiferae</i> (Mango malformation disease fungus)                                                                                                        |
| <b>N4UA15</b>     | FOC1_g10007481               | <i>Fusarium oxysporum</i> f. sp. cubense (strain race 1) (Panama disease fungus)                                                                                      |
| <b>X0AID2</b>     | FOMG_02397                   | <i>Fusarium oxysporum</i> f. sp. melonis 26406                                                                                                                        |
| <b>W9NUS4</b>     | FOVG_15024                   | <i>Fusarium oxysporum</i> f. sp. pisi HDV247                                                                                                                          |
| <b>A0A1L7W091</b> | FPRO_11517                   | <i>Fusarium proliferatum</i> (strain ET1) (Orchid endophyte fungus)                                                                                                   |
| <b>A0A2L2T1U9</b> |                              | <i>Fusarium venenatum</i>                                                                                                                                             |
| <b>A0A2H3SCJ6</b> | FFC1_11269                   | <i>Gibberella fujikuroi</i> (Bakanae and foot rot disease fungus) ( <i>Fusarium fujikuroi</i> )                                                                       |
| <b>W7MJ21</b>     | FVEG_07686                   | <i>Gibberella moniliformis</i> (strain M3125 / FGSC 7600) (Maize ear and stalk rot fungus) ( <i>Fusarium verticillioides</i> )                                        |
| <b>A0A2K0WGV6</b> | FNYG_05189                   | <i>Gibberella nygamai</i> (Bean root rot disease fungus) ( <i>Fusarium nygamai</i> )                                                                                  |
| <b>A0A2B7XTD3</b> | AJ79_02706                   | <i>Helicocarpus griseus</i> UAMH5409                                                                                                                                  |
| <b>A0A2B7XJ99</b> | AJ79_05800                   | <i>Helicocarpus griseus</i> UAMH5409                                                                                                                                  |
| <b>A0A1Y2W567</b> | M426DRAFT_47971              | <i>Hypoxyton</i> sp. CI-4A                                                                                                                                            |
| <b>A0A1Y2V3J9</b> | M434DRAFT_76425              | <i>Hypoxyton</i> sp. CO27-5                                                                                                                                           |
| <b>E5A5Y5</b>     | LEMA_P082690.1               | <i>Leptosphaeria maculans</i> (strain JN3 / isolate v23.1.3 / race Av1-4-5-6-7-8) (Blackleg fungus) ( <i>Phoma lingam</i> )                                           |
| <b>A0A175WE05</b> | MMYC01_201513                | <i>Madurella mycetomatis</i>                                                                                                                                          |

|                   |                       |                                                                                                                                                        |
|-------------------|-----------------------|--------------------------------------------------------------------------------------------------------------------------------------------------------|
| <b>A0A151V4J3</b> | MGG_10208             | <i>Magnaporthe oryzae</i> (strain 70-15 / ATCC MYA-4617 / FGSC 8958) (Rice blast fungus) ( <i>Pyricularia oryzae</i> )                                 |
| <b>A0A136J859</b> | Micbo1qcDRAFT_232912  | <i>Microdochium bolleyi</i>                                                                                                                            |
| <b>G2QP40</b>     | MYCTH_2313229         | <i>Myceliophthora thermophila</i> (strain ATCC 42464 / BCRC 31852 / DSM 1799) ( <i>Sporotrichum thermophile</i> )                                      |
| <b>C7Z3N0</b>     | NECHADRAFT_83307      | <i>Nectria haematococca</i> (strain 77-13-4 / ATCC MYA-4622 / FGSC 9596 / MPVI) ( <i>Fusarium solani</i> subsp. <i>pisi</i> )                          |
| <b>A0A0P7AKS7</b> | AK830_g8222           | <i>Neonectria ditissima</i>                                                                                                                            |
| <b>A1DCZ0</b>     | NFIA_027740           | <i>Neosartorya fischeri</i> (strain ATCC 1020 / DSM 3700 / CBS 544.65 / FGSC A1164 / JCM 1740 / NRRL 181 / WB 181) ( <i>Aspergillus fischerianus</i> ) |
| <b>A1D1F9</b>     | NFIA_009310           | <i>Neosartorya fischeri</i> (strain ATCC 1020 / DSM 3700 / CBS 544.65 / FGSC A1164 / JCM 1740 / NRRL 181 / WB 181) ( <i>Aspergillus fischerianus</i> ) |
| <b>A0A229Y606</b> | CDV57_02697           | <i>Neosartorya fumigata</i> ( <i>Aspergillus fumigatus</i> )                                                                                           |
| <b>Q6MWQ3</b>     | B24N4.140             | <i>Neurospora crassa</i>                                                                                                                               |
| <b>A0A177C2Q2</b> | CC84DRAFT_1262742     | <i>Paraphaeosphaeria sporulosa</i>                                                                                                                     |
| <b>A0A1V6PZ81</b> | PENANT_c024G06821     | <i>Penicillium antarcticum</i>                                                                                                                         |
| <b>A0A1F5L9I4</b> | PENARI_c020G01612     | <i>Penicillium arizonense</i>                                                                                                                          |
| <b>A0A1S9S1F3</b> | PEBR_08403            | <i>Penicillium brasilianum</i>                                                                                                                         |
| <b>A0A0F7TJL1</b> | PMG11_02977           | <i>Penicillium brasilianum</i>                                                                                                                         |
| <b>A0A0G4P5S8</b> | PCAMFM013_S006g000215 | <i>Penicillium camemberti</i> FM 013                                                                                                                   |
| <b>A0A0G4P905</b> | PCAMFM013_S008g000211 | <i>Penicillium camemberti</i> FM 013                                                                                                                   |
| <b>A0A167PZ82</b> | EN45_111530           | <i>Penicillium chrysogenum</i> ( <i>Penicillium notatum</i> )                                                                                          |
| <b>A0A1V6U8J6</b> | PENCOP_c015G04110     | <i>Penicillium coprophilum</i>                                                                                                                         |
| <b>A0A1V6UQV5</b> | PENCOP_c005G03047     | <i>Penicillium coprophilum</i>                                                                                                                         |
| <b>A0A0A2JQW9</b> | PEX2_022470           | <i>Penicillium expansum</i> (Blue mold rot fungus)                                                                                                     |
| <b>A0A0A2KSS1</b> | PEX2_061300           | <i>Penicillium expansum</i> (Blue mold rot fungus)                                                                                                     |
| <b>A0A1V6SRF9</b> | PENFLA_c028G08892     | <i>Penicillium flavigenum</i>                                                                                                                          |
| <b>A0A1V6SVS5</b> | PENFLA_c022G02189     | <i>Penicillium flavigenum</i>                                                                                                                          |
| <b>A0A101MC66</b> | ACN42_g9323           | <i>Penicillium freii</i>                                                                                                                               |
| <b>A0A101MF58</b> | ACN42_g7847           | <i>Penicillium freii</i>                                                                                                                               |
| <b>A0A1V6Z0K8</b> | PENNAL_c0006G01669    | <i>Penicillium nalgiovense</i>                                                                                                                         |
| <b>A0A0M8PAR7</b> | ACN38_g361            | <i>Penicillium nordicum</i>                                                                                                                            |
| <b>A0A0M8P8X0</b> | ACN38_g5977           | <i>Penicillium nordicum</i>                                                                                                                            |
| <b>S8AKS0</b>     | PDE_01354             | <i>Penicillium oxalicum</i> (strain 114-2 / CGMCC 5302) ( <i>Penicillium decumbens</i> )                                                               |
| <b>A0A135LNE1</b> | PGRI_069720           | <i>Penicillium patulum</i> ( <i>Penicillium griseofulvum</i> )                                                                                         |
| <b>A0A135LJJ3</b> | PGRI_029680           | <i>Penicillium patulum</i> ( <i>Penicillium griseofulvum</i> )                                                                                         |
| <b>A0A1V6NB36</b> | PENPOL_c014G03596     | <i>Penicillium polonicum</i>                                                                                                                           |

|                   |                              |                                                                                                                                        |
|-------------------|------------------------------|----------------------------------------------------------------------------------------------------------------------------------------|
| <b>A0A1V6N9I3</b> | PENPOL_c017G01197            | <i>Penicillium polonicum</i>                                                                                                           |
| <b>B6H504</b>     | Pc13g11940<br>PCH_Pc13g11940 | <i>Penicillium rubens</i> (strain ATCC 28089 / DSM 1075 / NRRL 1951 / Wisconsin 54-1255)<br>( <i>Penicillium chrysogenum</i> )         |
| <b>A0A1V6QVM1</b> | PENSOL_c034G01509            | <i>Penicillium solitum</i>                                                                                                             |
| <b>A0A1V6R149</b> | PENSOL_c021G03186            | <i>Penicillium solitum</i>                                                                                                             |
| <b>A0A1V6TYC2</b> | PENSTE_c001G01023            | <i>Penicillium steckii</i>                                                                                                             |
| <b>A0A1V6RT27</b> | PENVUL_c030G06465            | <i>Penicillium vulpinum</i>                                                                                                            |
| <b>A0A1V6RFV6</b> | PENVUL_c053G07299            | <i>Penicillium vulpinum</i>                                                                                                            |
| <b>W3WVP5</b>     | PFICI_10005                  | <i>Pestalotiopsis fici</i> (strain W106-1 / CGMCC3.15140)                                                                              |
| <b>W3XHU1</b>     | PFICI_03594                  | <i>Pestalotiopsis fici</i> (strain W106-1 / CGMCC3.15140)                                                                              |
| <b>A0A1L7XTD6</b> | PAC_18201                    | <i>Phialocephala subalpina</i>                                                                                                         |
| <b>B2AD24</b>     | PODANS_3_10650               | <i>Podospora anserina</i> (strain S / ATCC MYA-4624 / DSM 980 / FGSC 10383) ( <i>Pleurance anserina</i> )                              |
| <b>A0A2B7Y8F4</b> | AJ80_03622                   | <i>Polytolypa hystricis</i> UAMH7299                                                                                                   |
| <b>A0A176ZZF0</b> | VC83_08192                   | <i>Pseudogymnoascus destructans</i>                                                                                                    |
| <b>L8FZK9</b>     | GMDG_01921                   | <i>Pseudogymnoascus destructans</i> (strain ATCC MYA-4855 / 20631-21) (Bat white-nose syndrome fungus) ( <i>Geomyces destructans</i> ) |
| <b>A0A1B8FEW2</b> | VE02_09112                   | <i>Pseudogymnoascus</i> sp. 03VT05                                                                                                     |
| <b>A0A1B8F0P0</b> | VF21_05124                   | <i>Pseudogymnoascus</i> sp. 05NY08                                                                                                     |
| <b>A0A1B8ESK0</b> | VF21_06861                   | <i>Pseudogymnoascus</i> sp. 05NY08                                                                                                     |
| <b>A0A1B8DR19</b> | VE03_09245                   | <i>Pseudogymnoascus</i> sp. 23342-1-11                                                                                                 |
| <b>A0A1B8DX52</b> | VE03_06159                   | <i>Pseudogymnoascus</i> sp. 23342-1-11                                                                                                 |
| <b>A0A1B8CWZ5</b> | VE04_07979                   | <i>Pseudogymnoascus</i> sp. 24MN13                                                                                                     |
| <b>A0A093XP69</b> | V490_04348                   | <i>Pseudogymnoascus</i> sp. VKM F-3557                                                                                                 |
| <b>A0A093YWU5</b> | V491_08114                   | <i>Pseudogymnoascus</i> sp. VKM F-3775                                                                                                 |
| <b>A0A093YAT7</b> | O988_02379                   | <i>Pseudogymnoascus</i> sp. VKM F-3808                                                                                                 |
| <b>A0A094B414</b> | O988_00252                   | <i>Pseudogymnoascus</i> sp. VKM F-3808                                                                                                 |
| <b>A0A093Z9K5</b> | V492_06850                   | <i>Pseudogymnoascus</i> sp. VKM F-4246                                                                                                 |
| <b>A0A094BWU4</b> | V492_02397                   | <i>Pseudogymnoascus</i> sp. VKM F-4246                                                                                                 |
| <b>A0A093ZUQ3</b> | V493_08371                   | <i>Pseudogymnoascus</i> sp. VKM F-4281 (FW-2241)                                                                                       |
| <b>A0A094CR23</b> | V493_04902                   | <i>Pseudogymnoascus</i> sp. VKM F-4281 (FW-2241)                                                                                       |
| <b>A0A094BHW5</b> | V494_06392                   | <i>Pseudogymnoascus</i> sp. VKM F-4513 (FW-928)                                                                                        |
| <b>A0A094BIT3</b> | V494_06121                   | <i>Pseudogymnoascus</i> sp. VKM F-4513 (FW-928)                                                                                        |
| <b>A0A094CHM2</b> | V496_07594                   | <i>Pseudogymnoascus</i> sp. VKM F-4515 (FW-2607)                                                                                       |
| <b>A0A094FMF4</b> | V497_03375                   | <i>Pseudogymnoascus</i> sp. VKM F-4516 (FW-969)                                                                                        |
| <b>A0A094G2L0</b> | V498_06073                   | <i>Pseudogymnoascus</i> sp. VKM F-4517 (FW-2822)                                                                                       |
| <b>A0A094F3V1</b> | V500_08416                   | <i>Pseudogymnoascus</i> sp. VKM F-4518 (FW-2643)                                                                                       |
| <b>A0A094GHL8</b> | V500_01018                   | <i>Pseudogymnoascus</i> sp. VKM F-4518 (FW-2643)                                                                                       |
| <b>A0A094EYE2</b> | V500_11384                   | <i>Pseudogymnoascus</i> sp. VKM F-4518 (FW-2643)                                                                                       |
| <b>A0A094H6F6</b> | V501_04976                   | <i>Pseudogymnoascus</i> sp. VKM F-4519 (FW-2642)                                                                                       |

|                   |                      |                                                                                                                                                       |
|-------------------|----------------------|-------------------------------------------------------------------------------------------------------------------------------------------------------|
| <b>A0A094IVN6</b> | V501_10519           | <i>Pseudogymnoascus</i> sp. VKM F-4519 (FW-2642)                                                                                                      |
| <b>A0A094H1V3</b> | V502_08997           | <i>Pseudogymnoascus</i> sp. VKM F-4520 (FW-2644)                                                                                                      |
| <b>A0A094ID80</b> | V502_01797           | <i>Pseudogymnoascus</i> sp. VKM F-4520 (FW-2644)                                                                                                      |
| <b>A0A1B8CBQ9</b> | VE00_05479           | <i>Pseudogymnoascus</i> sp. WSF 3629                                                                                                                  |
| <b>A0A1B8CH42</b> | VE00_02898           | <i>Pseudogymnoascus</i> sp. WSF 3629                                                                                                                  |
| <b>A0A1Y2DQ45</b> | BCR38DRAFT_487164    | <i>Pseudomassariella vexata</i>                                                                                                                       |
| <b>A0A178DWP8</b> | IQ07DRAFT_515365     | <i>Pyrenochaeta</i> sp. DS3sAY3a                                                                                                                      |
| <b>E3RYB2</b>     | PTT_14495            | <i>Pyrenophora teres</i> f. <i>teres</i> (strain 0-1) (Barley net blotch fungus) ( <i>Drechslera teres</i> f. <i>teres</i> )                          |
| <b>A0A1S8AB41</b> | SAMD00023353_1030050 | <i>Rosellinia necatrix</i> (White root-rot fungus)                                                                                                    |
| <b>A0A084G3W6</b> | SAPIO_CDS6431        | <i>Scedosporium apiospermum</i>                                                                                                                       |
| <b>R0K3Z1</b>     | SETTUDRAFT_177090    | <i>Setosphaeria turcica</i> (strain 28A) (Northern leaf blight fungus) ( <i>Exserohilum turcicum</i> )                                                |
| <b>F7VQ11</b>     | SMAC_06790           | <i>Sordaria macrospora</i> (strain ATCC MYA-333 / DSM 997 / K(L3346) / K-hell)                                                                        |
| <b>A0A2K1QKD6</b> | CAC42_651            | <i>Sphaceloma murrayae</i>                                                                                                                            |
| <b>A0A084RM36</b> | S40288_01253         | <i>Stachybotrys chartarum</i> IBT 40288                                                                                                               |
| <b>A0A178AZ00</b> | IQ06DRAFT_292194     | <i>Stagonospora</i> sp. SRC1IsM3a                                                                                                                     |
| <b>A0A0U1MA04</b> | PISL3812_09507       | <i>Talaromyces islandicus</i> ( <i>Penicillium islandicum</i> )                                                                                       |
| <b>C9SL07</b>     | VDBG_05484           | <i>Verticillium alfalfae</i> (strain VaMs.102 / ATCC MYA-4576 / FGSC 10136) ( <i>Verticillium</i> wilt of alfalfa) ( <i>Verticillium albo-atrum</i> ) |
| <b>G2X9U0</b>     | VDAG_07135           | <i>Verticillium dahliae</i> (strain VdLs.17 / ATCC MYA-4575 / FGSC 10137) ( <i>Verticillium</i> wilt)                                                 |
| <b>A0A2J8FJP8</b> | VD0003_g2496         | <i>Verticillium dahliae</i> ( <i>Verticillium</i> wilt)                                                                                               |
| <b>A0A0G4M855</b> | BN1708_018452        | <i>Verticillium longisporum</i>                                                                                                                       |
| <b>A0A0G4NDU3</b> | BN1723_006181        | <i>Verticillium longisporum</i>                                                                                                                       |
| <b>A0A0G4NDW8</b> | BN1723_006177        | <i>Verticillium longisporum</i>                                                                                                                       |
| <b>A0A0G4LRZ1</b> | BN1708_003943        | <i>Verticillium longisporum</i>                                                                                                                       |
